# Supplementary material for: Dynamic Structure-Based Pharmacophore Model Development: A New and Effective Addition in the Histone Deacetylase 8 (HDAC8) Inhibitor Discovery
Source: PubMed Central journal article supplement (PMC3257139; doi:10.3390/ijms12129440), 2011-12-19

## Supplementary

**Figure S1.** Molecular docking of C1 and C2 at the active site of HDAC8. (a) The overlay of best docked poses of C1 and C2 with the full structure of HDAC8. Close views of the docked pose of C1 (b) and C2 (c). This figure was generated using Discovery Studio.

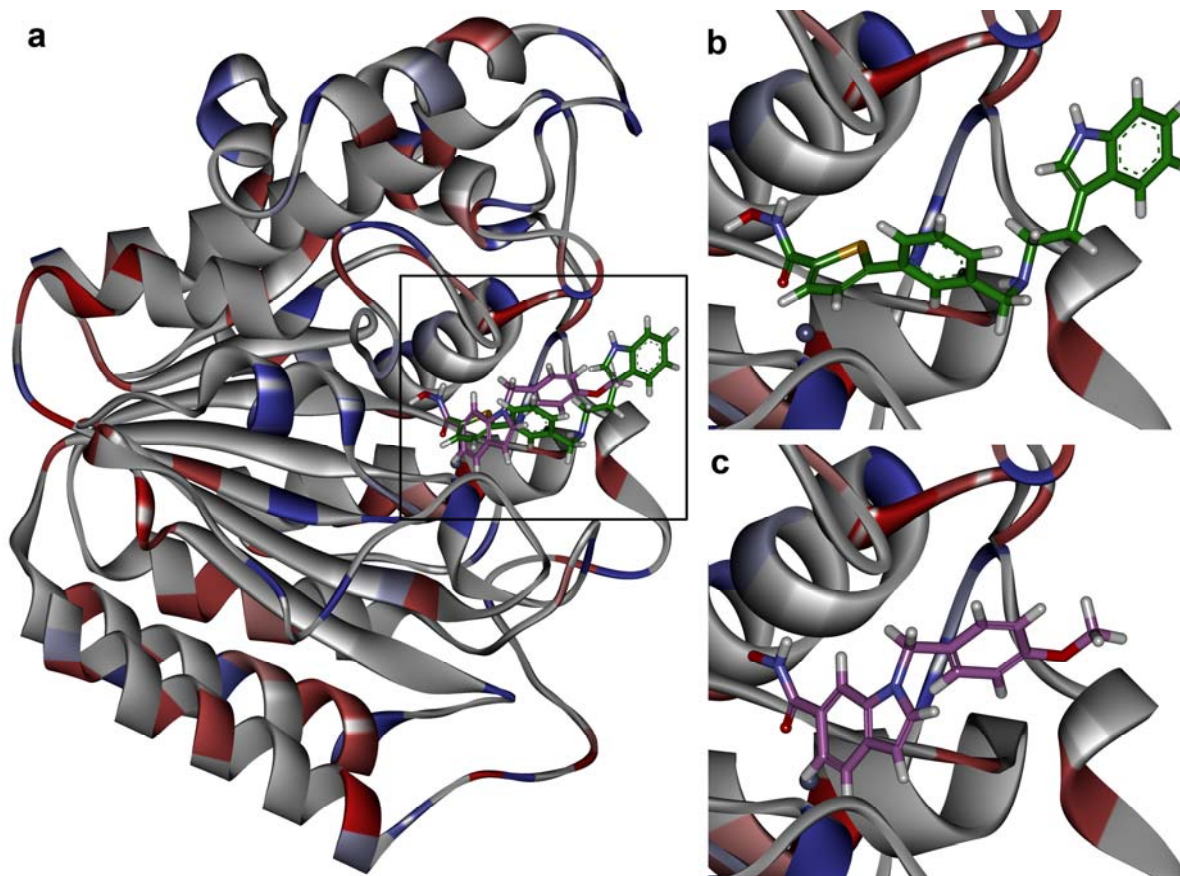

**Figure S2.** Distance between the hydroxamic moieties of C1, C2 and divalent metal ( $Zn^{2+}$ ) ion.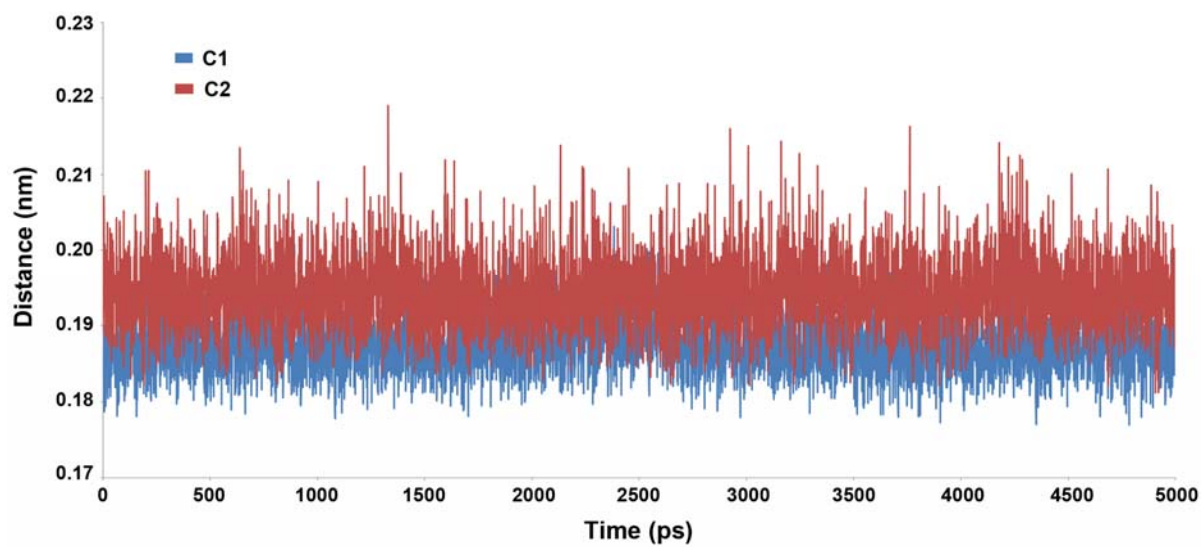**Figure S3.** The number of hydrogen bonds formed between inhibitors (C1 and C2) under study and the protein.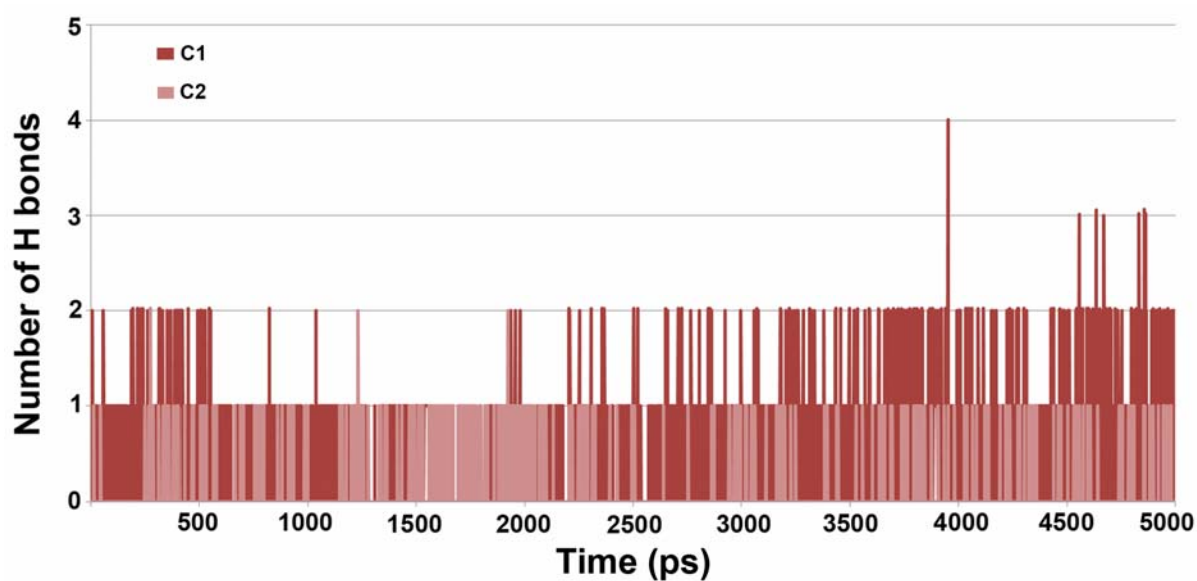

**Figure S4.** Pharmacophore overlay of C1 over Pharm-A shown at the active site of the dynamic HDAC8-C1 complex.

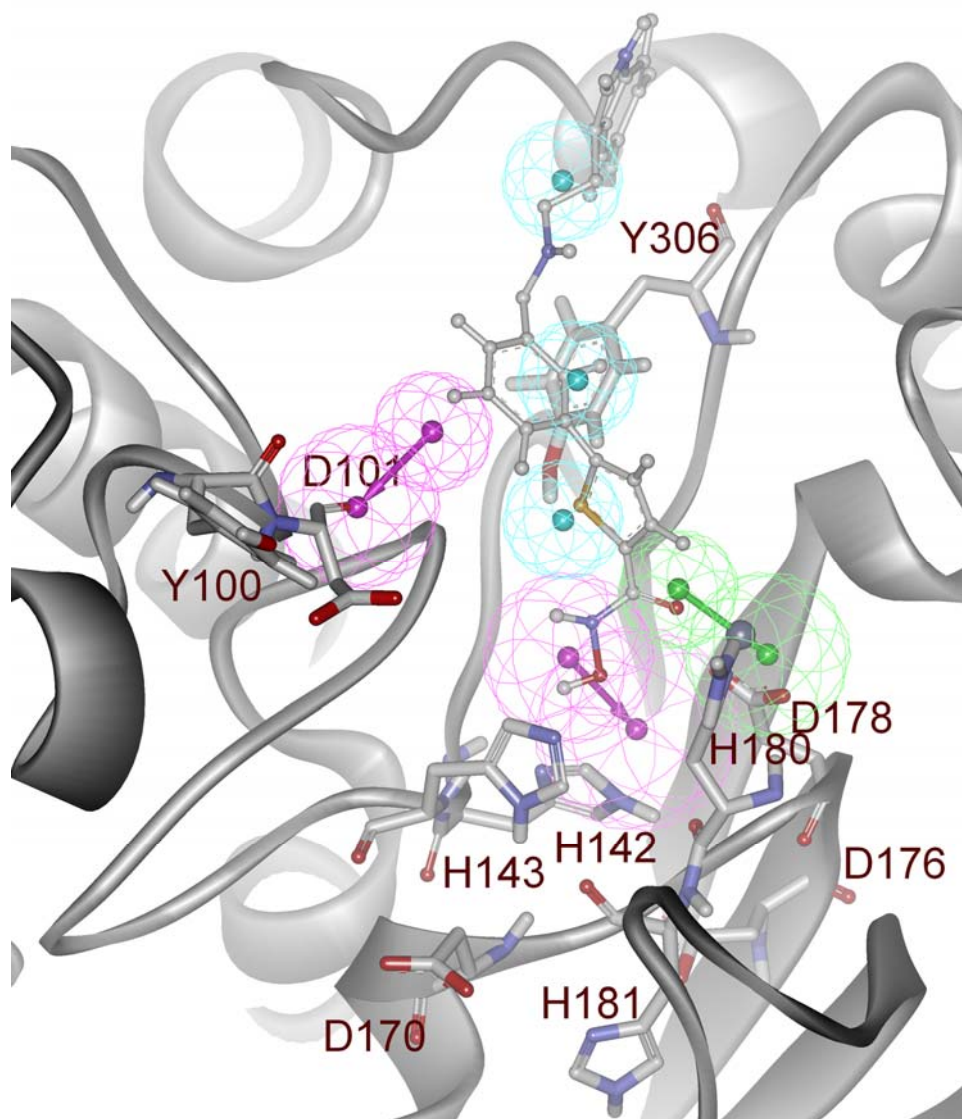

**Figure S5.** Pharmacophore overlay of C2 over Pharm-B shown at the active site of the dynamic HDAC8-C2 complex.

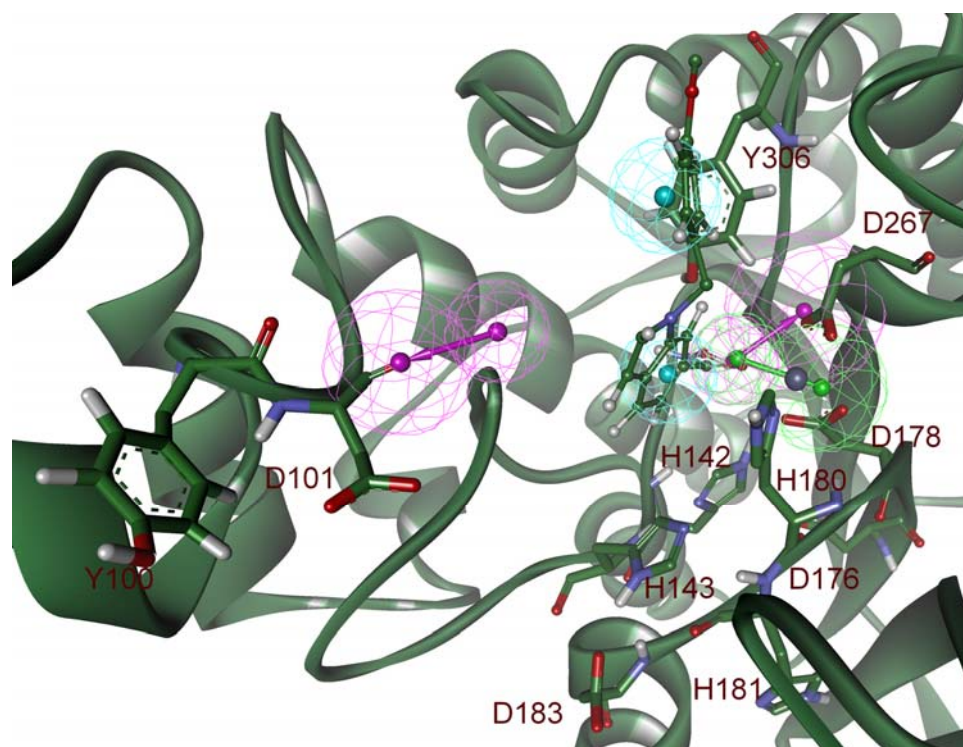

Supplement: ijms-12-09440-s001.pdf [file ijms-12-09440-s001.pdf]
